# Supplementary material for: Stiffness and thickness of the upper trapezius muscle increase after repeated climbing bouts in male climbers
Source: PeerJ. 2022 Dec 6;10:e14409. doi: 10.7717/peerj.14409 (PMC9745787; doi:10.7717/peerj.14409)
Supplement: Supplemental Information 1 [file peerj-10-14409-s001.xlsx]

## Sheet: Stiffness
Side	Location	Baseline	After_1	After_2	After_3	After_4	After_5
Right	Point_1	256	405	440	487	410	662
Right	Point_1	207	344	322	396	531	436
Right	Point_1	215	324	318	492	369	518
Right	Point_1	241	331	376	339	437	371
Right	Point_1	280	381	396	327	334	480
Right	Point_1	306	369	332	487	393	563
Right	Point_1	203	295	428	438	447	597
Right	Point_1	247	355	368	305	396	486
Right	Point_1	227	348	427	333	470	665
Right	Point_1	260	357	361	409	360	693
Right	Point_1	273	362	452	426	451	679
Right	Point_1	288	379	338	439	460	801
Right	Point_1	270	345	394	567	396	577
Right	Point_1	336	420	446	403	503	487
Right	Point_1	336	332	421	474	485	698
Left	Point_1	200	294	418	325	453	371
Left	Point_1	280	226	329	412	449	480
Left	Point_1	222	215	313	251	462	563
Left	Point_1	255	245	336	380	412	597
Left	Point_1	233	381	306	295	405	486
Left	Point_1	390	341	372	455	392	665
Left	Point_1	320	336	411	398	444	693
Left	Point_1	231	311	365	422	394	679
Left	Point_1	215	392	437	510	412	801
Left	Point_1	260	355	419	281	429	577
Left	Point_1	460	298	454	512	406	487
Left	Point_1	304	278	452	274	573	698
Left	Point_1	334	249	391	776	502	429
Left	Point_1	413	318	383	381	502	402
Left	Point_1	350	305	380	327	475	457
Right	Point_2	267	443	452	458	580	429
Right	Point_2	257	480	463	489	453	402
Right	Point_2	271	469	473	465	494	457
Right	Point_2	254	488	424	493	417	578
Right	Point_2	262	338	490	456	502	469
Right	Point_2	262	345	393	400	416	558
Right	Point_2	261	354	406	579	397	685
Right	Point_2	276	363	462	436	786	410
Right	Point_2	272	322	407	803	527	475
Right	Point_2	276	368	416	637	836	789
Right	Point_2	256	371	418	679	535	598
Right	Point_2	265	362	514	584	767	445
Right	Point_2	269	387	437	492	528	462
Right	Point_2	279	307	415	487	437	480
Right	Point_2	279	307	415	487	537	480
Left	Point_2	189	284	399	387	456	469
Left	Point_2	230	248	227	405	560	558
Left	Point_2	354	362	432	465	597	685
Left	Point_2	287	386	447	509	587	410
Left	Point_2	329	414	459	566	589	475
Left	Point_2	415	474	441	494	514	789
Left	Point_2	299	364	450	555	434	598
Left	Point_2	235	382	399	455	609	445
Left	Point_2	214	321	402	510	434	462
Left	Point_2	360	435	449	457	504	480
Left	Point_2	287	307	364	426	539	486
Left	Point_2	274	321	472	539	588	693
Left	Point_2	225	384	435	506	564	679
Left	Point_2	215	325	466	511	549	601
Left	Point_2	202	474	507	580	592	698
Right	Point_3	223	396	404	433	447	486
Right	Point_3	206	340	411	439	460	693
Right	Point_3	218	376	402	403	496	679
Right	Point_3	235	337	480	412	485	601
Right	Point_3	213	349	424	406	486	698
Right	Point_3	247	374	433	573	693	457
Right	Point_3	265	374	423	502	679	558
Right	Point_3	295	420	413	456	601	640
Right	Point_3	236	379	480	487	698	669
Right	Point_3	258	382	446	434	457	505
Right	Point_3	281	376	430	396	558	453
Right	Point_3	223	464	450	439	567	580
Right	Point_3	278	344	398	443	503	569
Right	Point_3	204	316	387	448	579	603
Right	Point_3	204	316	419	448	579	607
Left	Point_3	238	341	424	478	412	457
Left	Point_3	292	309	390	305	406	558
Left	Point_3	272	392	459	465	573	510
Left	Point_3	227	323	456	466	502	569
Left	Point_3	261	403	474	424	556	605
Left	Point_3	265	358	442	490	587	543
Left	Point_3	219	430	477	493	534	580
Left	Point_3	217	325	414	406	534	469
Left	Point_3	293	359	460	462	573	507
Left	Point_3	264	383	467	507	588	520
Left	Point_3	260	381	462	416	538	454
Left	Point_3	292	395	433	418	545	534
Left	Point_3	252	352	440	414	554	592
Left	Point_3	226	415	519	537	563	587
Left	Point_3	230	328	420	515	522	538
Right	Point_4	263	345	338	452	637	670
Right	Point_4	259	354	459	457	679	714
Right	Point_4	256	340	355	287	584	684
Right	Point_4	239	300	321	492	631	742
Right	Point_4	290	434	470	487	437	737
Right	Point_4	258	350	369	409	447	688
Right	Point_4	200	396	380	412	451	817
Right	Point_4	218	352	385	573	486	553
Right	Point_4	285	356	473	434	679	829
Right	Point_4	266	374	483	434	558	887
Right	Point_4	230	393	331	452	410	929
Right	Point_4	296	340	316	394	409	834
Right	Point_4	258	346	365	436	439	834
Right	Point_4	242	346	411	478	466	834
Right	Point_4	242	346	411	478	466	834
Left	Point_4	290	356	418	504	368	567
Left	Point_4	278	478	468	454	371	303
Left	Point_4	274	373	446	458	362	579
Left	Point_4	226	445	435	463	387	637
Left	Point_4	216	287	377	468	507	679
Left	Point_4	214	416	410	472	496	584
Left	Point_4	241	340	334	477	539	687
Left	Point_4	210	300	384	423	543	580
Left	Point_4	268	375	372	443.179	548	622
Left	Point_4	312	301	370	463.357	552	655
Left	Point_4	247	391	368	483.536	557	614
Left	Point_4	216	287	386	503.714	566	690
Left	Point_4	214	416	457	523.893	562	620
Left	Point_4	241	340	348	544.071	536	631
Left	Point_4	210	300	357	564.25	518	615

## Sheet: Thickness
Side	Location	Baseline	After_1	After_2	After_3	After_4	After_5
Right	Point_1	6.17	6.77	7.06	7.41	8.01	7.78
Right	Point_1	6.37	6.64	7.96	7.61	7.88	7.17
Right	Point_1	5.58	6.77	7.09	7.82	8.01	8.46
Right	Point_1	6.58	6.7	7.76	7.78	7.9	7.48
Right	Point_1	6.26	6.68	7.01	7.5	7.92	7.25
Right	Point_1	6.68	6.86	7.53	7.92	8.1	8.46
Right	Point_1	5.91	6.77	8.2	7.15	8.01	7.2
Right	Point_1	6.22	6.7	7.54	7.46	7.94	7.21
Right	Point_1	6.5	6.69	7.17	7.68	7.87	8.46
Right	Point_1	6.26	6.53	7.68	7.5	7.77	7.83
Right	Point_1	6.68	6.78	7.25	7.92	8.02	7.85
Right	Point_1	6.22	6.79	7.74	7.46	8.03	7.87
Right	Point_1	6.5	6.68	7.86	7.74	7.92	7.89
Right	Point_1	6.48	5.91	7.78	7.72	7.15	7.91
Right	Point_1	6.2	6.5	7.17	7.44	7.74	7.94
Left	Point_1	6.48	6.44	8.46	7.82	7.78	7.96
Left	Point_1	6.46	6.31	7.48	7.7	7.55	7.98
Left	Point_1	6.06	6.44	7.25	7.3	7.68	8
Left	Point_1	6.46	6.37	8.46	7.7	7.61	7.67
Left	Point_1	5.91	6.35	7.2	7.15	7.59	8.46
Left	Point_1	6.14	6.53	7.21	7.38	7.77	7.9
Left	Point_1	6.14	6.44	8.46	7.38	7.68	7.11
Left	Point_1	6.14	6.37	7.44	7.38	7.61	8.46
Left	Point_1	6.08	6.36	7.67	7.32	7.6	7.14
Left	Point_1	6.64	6.35	8.46	7.81	7.52	7.16
Left	Point_1	6.28	6.6	7.9	7.45	7.77	7.18
Left	Point_1	5.78	6.61	7.113	7.95	7.78	7.05
Left	Point_1	6.48	6.5	8.46	7.65	7.67	6.92
Left	Point_1	6.22	5.73	7.136	7.39	6.9	6.79
Left	Point_1	5.91	6.32	7.159	7.08	7.49	6.67
Right	Point_2	6.25	7.24	7.57	7.75	7.9	8.03
Right	Point_2	7	7.8	8.86	9.04	9.19	9.32
Right	Point_2	6.05	8.19	8.35	8.53	8.68	8.81
Right	Point_2	6.16	7.01	7.41	7.59	7.74	7.87
Right	Point_2	6.79	8.11	8.53	8.71	8.86	8.99
Right	Point_2	7.2	7.22	7.29	7.47	7.62	7.75
Right	Point_2	6.3	7	8.57	8.75	8.9	9.03
Right	Point_2	7.1	7.4	9.9	10.08	10.23	10.36
Right	Point_2	7.38	7.72	7.48	7.66	7.81	7.94
Right	Point_2	6.79	8.61	7.64	7.82	7.97	8.1
Right	Point_2	7.2	7.58	7.09	7.27	7.42	7.55
Right	Point_2	7.1	7.42	8.76	8.94	9.09	9.22
Right	Point_2	7.38	6.87	7.4	7.58	7.71	7.84
Right	Point_2	6.78	7.2	8.5	8.68	8.81	8.94
Right	Point_2	6.36	6.3	8.63	8.81	8.94	9.07
Left	Point_2	6.78	7.38	8.12	8.3	8.43	8.56
Left	Point_2	6.08	6.69	7.46	7.64	7.77	7.9
Left	Point_2	6.63	6.82	8.39	8.57	8.7	8.83
Left	Point_2	7.13	6.56	8.9	9.08	9.21	9.34
Left	Point_2	6.56	7.66	7.46	7.64	7.77	7.9
Left	Point_2	7.48	6.77	8.14	8.32	8.45	8.58
Left	Point_2	6.79	6.55	8.19	8.37	8.5	8.63
Left	Point_2	7.12	6.95	7.46	7.64	7.77	7.9
Left	Point_2	7.22	7.27	8.24	8.42	8.55	8.68
Left	Point_2	8.19	8.16	8.29	8.47	8.6	8.73
Left	Point_2	6.35	7.13	7.46	7.64	7.77	7.9
Left	Point_2	8.55	6.97	8.35	8.53	8.66	8.79
Left	Point_2	7.72	6.42	8.4	8.58	8.71	8.84
Left	Point_2	8.98	6.75	7.46	7.64	7.77	7.9
Left	Point_2	5.68	5.85	7.46	7.64	7.77	7.9
Right	Point_3	8.69	8.81	8.92	9.07	9.25	9.36
Right	Point_3	7.74	7.86	7.97	8.12	8.3	8.41
Right	Point_3	7.74	7.86	7.97	8.12	8.3	8.41
Right	Point_3	7.97	8.09	8.2	8.35	8.53	8.64
Right	Point_3	6.27	6.39	6.5	6.65	6.83	6.94
Right	Point_3	7.74	7.86	7.97	8.12	8.3	8.41
Right	Point_3	6.61	6.73	6.84	6.99	7.17	7.28
Right	Point_3	6.44	6.56	6.67	6.82	7	7.11
Right	Point_3	6.52	6.64	6.75	6.9	7.08	7.19
Right	Point_3	6.27	6.39	6.5	6.65	6.83	6.94
Right	Point_3	7.74	7.86	7.97	8.12	8.3	8.41
Right	Point_3	6.44	6.56	6.67	6.82	7	7.11
Right	Point_3	6.52	6.64	6.75	6.9	7.08	7.19
Right	Point_3	7.17	7.29	7.4	7.55	7.73	7.84
Right	Point_3	6.91	7.03	7.14	7.29	7.47	7.58
Left	Point_3	7.17	7.29	7.4	7.55	7.73	7.84
Left	Point_3	6.64	6.76	6.87	7.02	7.2	7.31
Left	Point_3	8.62	8.74	8.85	9	9.18	9.29
Left	Point_3	7.26	7.38	7.49	7.64	7.82	7.93
Left	Point_3	6.35	6.47	6.58	6.73	6.91	7.02
Left	Point_3	8.03	8.15	8.26	8.41	8.59	8.7
Left	Point_3	7.17	7.29	7.4	7.55	7.73	7.84
Left	Point_3	7.72	7.84	7.95	8.1	8.28	8.39
Left	Point_3	7.61	7.73	7.84	7.99	8.17	8.28
Left	Point_3	8.79	8.91	9.02	9.17	9.35	9.46
Left	Point_3	6.32	6.44	6.55	6.7	6.88	6.99
Left	Point_3	8.88	9	9.11	9.26	9.44	9.55
Left	Point_3	7.6	7.72	7.83	7.98	8.16	8.27
Left	Point_3	8.15	8.27	8.38	8.53	8.71	8.82
Left	Point_3	6.94	7.06	7.17	7.32	7.5	7.61
Right	Point_4	8.17	8.29	8.4	8.55	8.73	8.84
Right	Point_4	8.28	8.4	8.51	8.66	8.84	8.95
Right	Point_4	8.45	8.57	8.68	8.83	9.01	9.12
Right	Point_4	9.29	9.41	9.52	9.67	9.85	9.96
Right	Point_4	6.23	6.35	6.46	6.61	6.79	6.9
Right	Point_4	8.48	8.6	8.71	8.86	9.04	9.15
Right	Point_4	6.97	7.09	7.2	7.35	7.53	7.64
Right	Point_4	6.91	7.03	7.14	7.29	7.47	7.58
Right	Point_4	7.5	7.62	7.73	7.88	8.06	8.17
Right	Point_4	6.23	6.35	6.46	6.61	6.79	6.9
Right	Point_4	8.48	8.6	8.71	8.86	9.04	9.15
Right	Point_4	6.91	7.03	7.14	7.29	7.47	7.58
Right	Point_4	7.5	7.62	7.73	7.88	8.06	8.17
Right	Point_4	7.6	7.72	7.83	7.98	8.16	8.27
Right	Point_4	7.44	7.56	7.67	7.82	8	8.11
Left	Point_4	7.6	7.72	7.83	7.98	8.16	8.27
Left	Point_4	6.24	6.36	6.47	6.62	6.8	6.91
Left	Point_4	9.5	9.62	9.73	9.88	10.06	10.17
Left	Point_4	7.35	7.47	7.58	7.73	7.91	8.02
Left	Point_4	7.01	7.13	7.24	7.39	7.57	7.68
Left	Point_4	8.58	8.7	8.81	8.96	9.14	9.25
Left	Point_4	7.67	7.79	7.9	8.05	8.23	8.34
Left	Point_4	7.72	7.84	7.95	8.1	8.28	8.39
Left	Point_4	8.1	8.22	8.33	8.48	8.66	8.77
Left	Point_4	9.09	9.21	9.32	9.47	9.65	9.76
Left	Point_4	8.79	8.91	9.02	9.17	9.35	9.46
Left	Point_4	9.93	10.05	10.16	10.31	10.49	10.6
Left	Point_4	8.79	8.91	9.02	9.17	9.35	9.46
Left	Point_4	8.56	8.68	8.79	8.94	9.12	9.23
Left	Point_4	7.27	7.39	7.5	7.65	7.83	7.94

## Sheet: RPE
Baseline	After_1	After_2	After_3	After_4	After_5
6	13	13	13	14	14
6	10	11	11	11	12
6	9	9	10	12	13
6	8	8	9	11	13
6	9	10	11	12	13
6	11	12	14	14	14
6	8	10	11	12	13
6	9	12	12	13	14
6	10	12	14	14	15
6	9	10	12	13	12
6	10	11	12	12	13
6	11	13	17	16	16
6	11	14	15	16	16
6	10	11	12	13	14
6	9	9	13	15	16

## Sheet: LA
Baseline	After_5
1.5	4.5
1	4.2
1.5	4.9
1.9	4.9
1.7	2.6
1.5	2.9
1.6	2.3
1.4	2.1
1.5	2.8
1.6	4.5
1.7	6.8
1.6	7
1.7	8.3
1.3	12.8
1.6	5.8
